# Supplementary material for: In silico screening of minocycline as an Mpro inhibitor and the adjunctive therapy value for the treatment of COVID-19
Source: Research Square preprint supplement (doi:10.21203/rs.3.rs-1528733/v1), 2022-04-18

Graphical abstract

***In silico* screening of minocycline as an Mpro inhibitor and the adjunctive therapy value for the treatment of COVID-19**

Bin Xiao1, Si Wu1, Yaru Han1, Liwen Ren2, Jinhua Wang2, Xiurong Luan1, Guanhua Du2,*, and Zhanfei She1,*

*1Laboratory of Clinical Pharmacy, Ordos Central Hospital, Ordos School of Clinical Medicine, Inner Mongolia Medical University, Ordos 017000, China; 2Beijing Key Laboratory of Drug Target Identification and Drug Screen, Institute of Materia Medica, Chinese Academy of Medical Sciences & Peking Union Medical College, Beijing 100050, China*


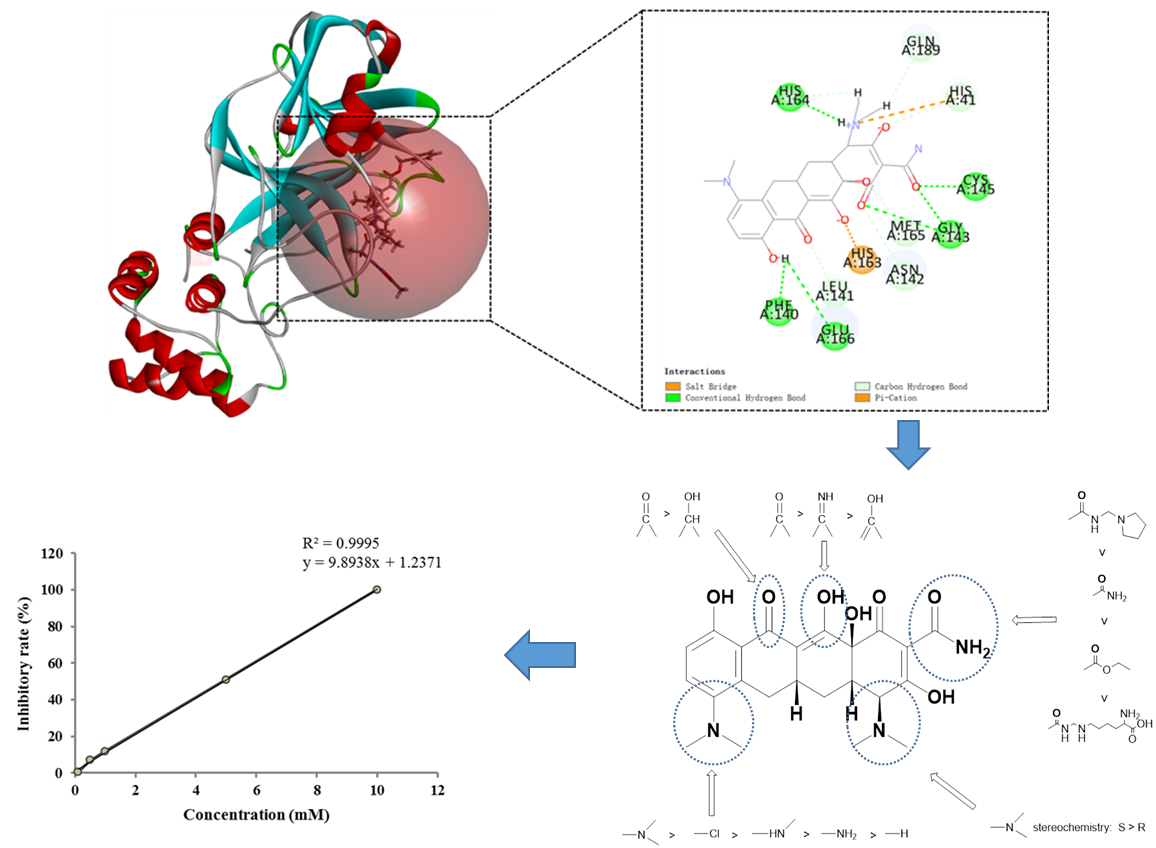

Supplement: Supplementary file 1 [file 5f3b775e9df563d874181c66.docx]
